# Supplementary material for: Chemical synthesis, characterization and theoretical investigations of stannite phase CuZn2AlS4 nanocrystals
Source: Royal Society of Chemistry journal article supplement (doi:10.1039/c5nj02365c), 2015-11-04
Supplement: c5nj02365c1.pdf [file c5nj02365c1.pdf]

## Supporting Information

### Chemical Synthesis, Characterization and Theoretical Investigations of Stannite Phase $\text{CuZn}_2\text{AlS}_4$ Nanocrystals

Anima Ghosh<sup>1,2</sup>, Rajalingam Thangavel<sup>1\*</sup> and Arunava Gupta<sup>2\*</sup>

<sup>1</sup>Solar Energy Research Laboratory, Department of Applied Physics, Indian School of Mines, Dhanbad, Jharkhand, India

<sup>2</sup>Center for Materials for Information Technology, The University of Alabama, Tuscaloosa, USA

\*[thangavel.r.ap@ismdhanbad.ac.in](mailto:thangavel.r.ap@ismdhanbad.ac.in), [agupta@mint.ua.edu](mailto:agupta@mint.ua.edu)

Table S1: Equilibrium total energy of various possible crystal structures of CZAS nanocrystals. (Simulation: Wien2k code).

| Structures of $\text{CuZn}_2\text{AlS}_4$                | Equilibrium total energy |
|----------------------------------------------------------|--------------------------|
| Wurtzite : $P6_3mc$ , space group no. 186                | -14147.19545             |
| Zinc blende: $F4-3m$ , space group no.216                | -14147.24191             |
| Orthorhombic : $Pmn2_1$ , space group no.31              | -14147.22109             |
| Kesterite : $I-4$ , space group no.82                    | -14174.243161            |
| <b>Stannite: <math>I-42m</math>, space group no. 121</b> | <b>-14174.244553</b>     |

Table S2: The optimized atomic positions for stannite  $\text{CuZn}_2\text{AlS}_4$ .

| Elements | Wyckoff | x/a    | y/b    | z/c    |
|----------|---------|--------|--------|--------|
| Cu       | 2a      | 0      | 0      | 0      |
| Zn       | 4d      | 0      | 0.5    | 0.25   |
| Al       | 2b      | 0      | 0      | 0.5    |
| S        | 8i      | 0.2537 | 0.2537 | 0.1205 |

Figure S1: Volume vs. Total energy for  $\text{CuZn}_2\text{AlS}_4$ .

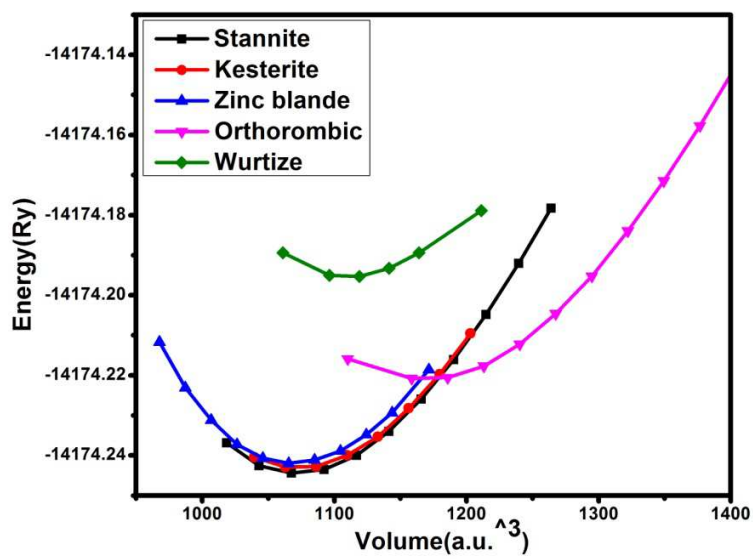

#### AUTHOR INFORMATION

##### Corresponding Author

[thanqavel.r.ap@ismdhanbad.ac.in](mailto:thanqavel.r.ap@ismdhanbad.ac.in)
